# Supplementary material for: Lycopene-Loaded Bilosomes Ameliorate High-Fat Diet-Induced Chronic Nephritis in Mice through the TLR4/MyD88 Inflammatory Pathway
Source: MDPI journal article supplement (doi:10.3390/foods11193042), 2022-09-30
Supplement: s1 [file s1]

## Supplementary Materials

**Table S1.** Sequences of PCR primers.

|                | Upstream primer (5'-3') | Downstream primer (5'-3') |
|----------------|-------------------------|---------------------------|
| $\beta$ -actin | GTTGTCGACGACGAGGG       | GCACAGAGCCTCGCCTT         |
| TLR4           | CACCAGGAAGCTTGAATCCCT   | TGCTGAGTTTCTGATCCATGC     |
| NF- $\kappa$ B | TGCAACAGATGGGCTACACAGT  | TCATCTATGTGCTGCCTCGT      |
| MyD88          | CATACCCTTGGTCGCGCTTA    | TCCGAGGGTTCAAGAACAGC      |
| TRIF           | GATCGTTTTCGCCGAGATGC    | GTTGTACTTGTGCTGCCTGC      |
| TIRAP          | CGCTGGAGCAAAGACTACGA    | CAGGAAGCAGCGTAGACTGG      |
| IL-6           | GTTGCCTTCTTGGGACTGATGT  | GGTCTGTTGTGGGTGGTATCCT    |
| IL-1 $\beta$   | GGACAGAACATAAGCCAACA    | CTTTCATCACACAGGACAGG      |
| TNF- $\alpha$  | ATGGGCTCCCTCTCATCAGT    | GCTTGGTGGTTTGCTACGAC      |
